# Supplementary material
Source: Springer Nature journal article supplement (https://www.springermedizin.de/resource/supplementary/12874_2010_571_MOESM1_ESM.pdf/9432484)

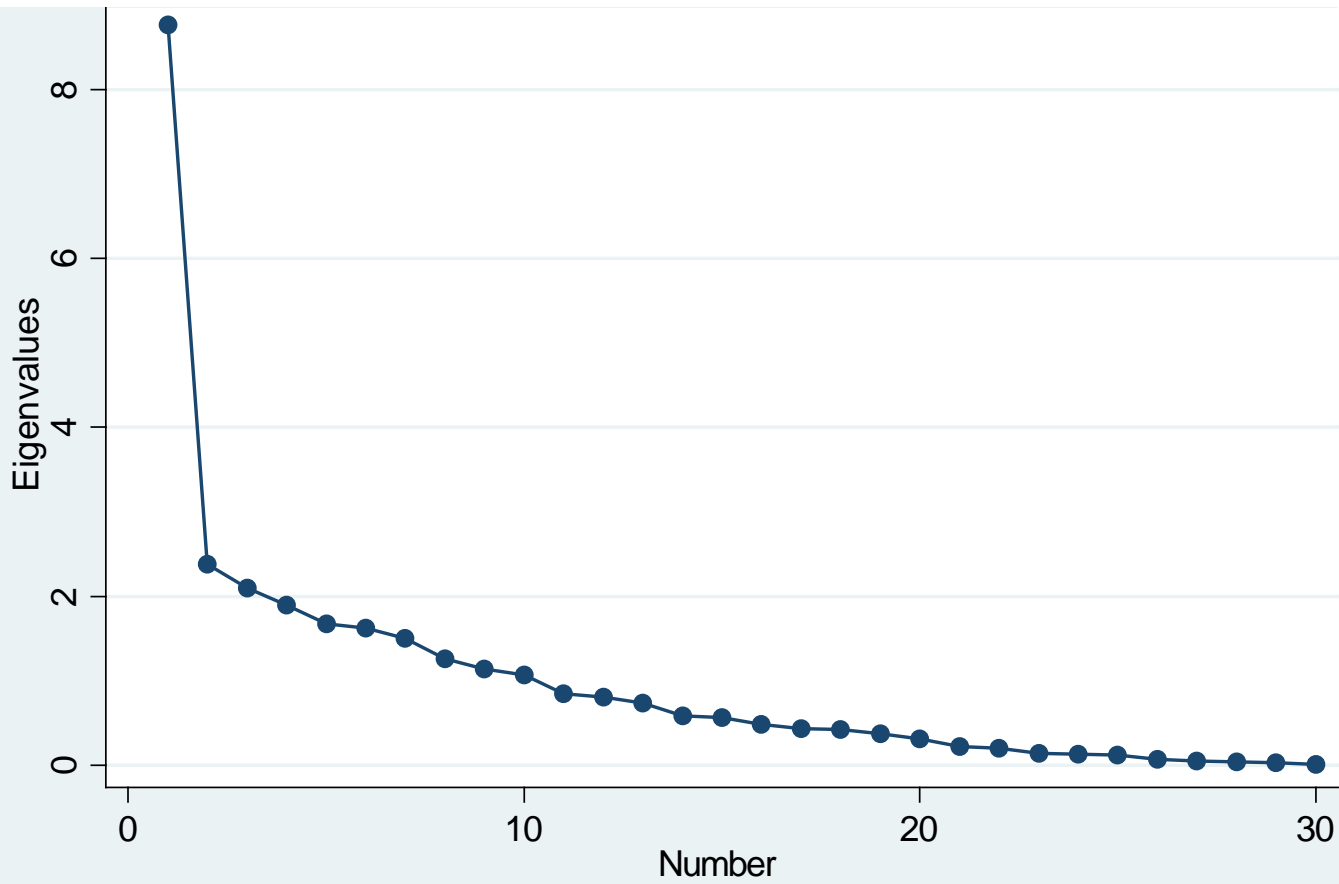

Supplement: MOESM1 [file 9432484]
